# Supplementary material for: Decreased electrocortical temporal complexity distinguishes sleep from wakefulness
Source: PubMed Central journal article supplement (PMC6895088; doi:10.1038/s41598-019-54788-6), 2019-12-05
Supplement: 41598_2019_54788_MOESM1_ESM.pdf [file 41598_2019_54788_MOESM1_ESM.pdf]

# Decreased electrocortical temporal complexity distinguishes sleep from wakefulness

Joaquín González<sup>1</sup>, Matias Cavelli<sup>1</sup>, Alejandra Mondino<sup>1</sup>, Claudia Pascovich<sup>1</sup>, Santiago Castro-Zaballa<sup>1</sup>, Pablo Torterolo<sup>1,\*</sup>, and Nicolás Rubido<sup>2</sup>

<sup>1</sup>Universidad de la República, Departamento de Fisiología de Facultad de Medicina, Av. Gral. Flores 2125, 11800 Montevideo, Uruguay, <sup>2</sup>Universidad de la República, Instituto de Física de Facultad de Ciencias, Iguá 4225, 11400 Montevideo, Uruguay.

\*Correspondence to: ptortero@fmed.edu.uy

## Supplementary Material

| Max Frequency | ANOVA (pValue) | F      | DF    | State Comparison | <i>post-hoc</i> (pValue) |
|---------------|----------------|--------|-------|------------------|--------------------------|
| 512Hz         | 4.63e-48       | 225.58 | 2,166 | W-NREM           | 9.5605e-10               |
|               |                |        |       | W-REM            | 9.5605e-10               |
|               |                |        |       | NREM-REM         | 9.5605e-10               |
| 256Hz         | 1.27e-49       | 239.23 | 2,166 | W-NREM           | 9.5605e-10               |
|               |                |        |       | W-REM            | 9.5605e-10               |
|               |                |        |       | NREM-REM         | 0.55869                  |
| 128Hz         | 1.01e-41       | 175.79 | 2,166 | W-NREM           | 9.5605e-10               |
|               |                |        |       | W-REM            | 9.5605e-10               |
|               |                |        |       | NREM-REM         | 9.5605e-10               |
| 64Hz          | 4.39e-49       | 234.46 | 2,166 | W-NREM           | 9.5605e-10               |
|               |                |        |       | W-REM            | 9.5605e-10               |
|               |                |        |       | NREM-REM         | 9.5605e-10               |
| 32Hz          | 2.37e-35       | 183.89 | 2,166 | W-NREM           | 9.5605e-10               |
|               |                |        |       | W-REM            | 1.3432e-05               |
|               |                |        |       | NREM-REM         | 9.561e-10                |

**Table S.1. PeEn and frequency content statistical summary.** This table provides the statistics for Fig.3a.

| Electrode | pValue   | F     | DF   | W-NREM<br>(pValue) | W-REM<br>(pValue) | NREM-REM<br>(pValue) |
|-----------|----------|-------|------|--------------------|-------------------|----------------------|
| OBr       | 0.0078   | 7.597 | 2,11 | 0.99               | 0.99              | 0.99                 |
| M1r       | < 0.0001 | 15.85 | 2,11 | 0.0001             | 0.70              | 0.03                 |
| M1l       | 0.0005   | 12.49 | 2,11 | 0.0017             | 0.99              | 0.02                 |
| S1r       | < 0.0001 | 16.93 | 2,11 | 0.0016             | 0.06              | 0.09                 |
| S1l       | 0.0002   | 14.63 | 2,11 | 0.0007             | 0.24              | 0.01                 |
| V2r       | < 0.0001 | 62.53 | 2,11 | 0.0003             | 0.0081            | 0.99                 |
| V2l       | 0.0002   | 47.68 | 2,11 | 0.0004             | 0.0053            | 0.312                |

**Table S.2. Statistical comparisons between Amplitude Entropy values during sleep and wakefulness.** This table provides the statistics for Fig.5. Each row corresponds to a different cortical location, as shown in Fig.1. Data was evaluated by repeated ANOVA (pValue column) and Bonferroni *post-hoc* test measures (last 3 columns of the table)
